# Supplementary material for: QTL Mapping of Tiller Number in Korean Japonica Rice Varieties
Source: MDPI journal article supplement (doi:10.3390/genes14081593), 2023-08-06
Supplement: s1 [file s1]

**Supplementary Table S1.** Primers used for analysis of the 4 bp TGTG insertion/deletion in the 5' UTR of *OsTB1*.

| Gene         | MSU ID         | RAP ID       | Accession No. | Purpose       |         | Primer Sequence (5'→3')   |
|--------------|----------------|--------------|---------------|---------------|---------|---------------------------|
| <i>OsTB1</i> | LOC_Os03g49880 | Os03g0706500 | AK107083      | amplification | Forward | GGAATGGAGGGAGTATGTTTTGTTG |
|              |                |              |               |               | Reverse | GTGGGTGGTGGTGGTAGTAG      |
|              |                |              |               | sequencing    | Forward | GAAGAGGATTACAAAGGAGGCA    |
|              |                |              |               |               | Reverse | TGGGGAATCGAAGAAAGGAA      |
|              |                |              |               | HRM marker    | Forward | CTGCCTCCTAATCCTCCT        |
|              |                |              |               |               | Reverse | ACCATGAGAGAAGAGACCAA      |

**Supplementary Table S2.** Locations of quantitative trait loci (QTL) associated with tiller number identified in the Odae<sup>\*5</sup>/Unbong40 BC4F2:F3 population in field trials in 2022.

| Measurement<br>Date (DAS) | QTL<br>Name | Chr. | Location<br>(cM) | QTL Interval<br>(cM) | Interval-Flanking Markers |          | LOD  | Additive<br>Effect | $R^2$ |
|---------------------------|-------------|------|------------------|----------------------|---------------------------|----------|------|--------------------|-------|
|                           |             |      |                  |                      | Left                      | Right    |      |                    |       |
| 2022. 6. 28<br>(64)       | <i>qTN3</i> | 3    | 8.91             | 7.7-10.5             | OU3FC_04                  | OU3FC_07 | 11.5 | 1.63               | 0.268 |
| 2022. 7. 5<br>(71)        | <i>qTN3</i> | 3    | 8.91             | 6.1-11.6             | OU3FC_01                  | OU3FC_09 | 6.0  | 1.06               | 0.172 |

DAS: days after sowing; Chr.: chromosome number; QTL interval: region containing the QTL at 95% probability; LOD: logarithm of the odds score.

**Supplementary Table S4.** Genotypes of 54 Korean *japonica* varieties at the TGTG insertion/deletion site in the 5' UTR of *OsTB1*.

| Allele Type         | Variation in Sequence | Variety                                                                                                                                                                                                                                                                                                                                                                                             |
|---------------------|-----------------------|-----------------------------------------------------------------------------------------------------------------------------------------------------------------------------------------------------------------------------------------------------------------------------------------------------------------------------------------------------------------------------------------------------|
| Reference type      | CTGTGTGTGTGTTCTACT    | Odae, Junam, Hwayoung, Ilpum, Saeilmi, Sodami, Namchan, Samgwang, Nampyeong, Hiami, Dongjin, Hangaru, Heukgwang, Goami, Haedeul, Saenuri, Beakokchal, Asemi, Alchanmi, Yechan, Jopyeong, Younghojinmi, Dodamssal, Sangju, Mangeum, Joun, Geumo, Jinok, Boramchan, Seomyeong, Haedamssal, Seolremi, Daebo, Pyeongwon, Jinbu, Daeribbyeolho, Jeokjinju, Cheongpum, Baekjinju1ho, Hopyeong, Aromi (41) |
| TGTG insertion type | CTGTGTGTGTGTGTTCTACT  | Unbong40, Dongan, Sindongjin, Ungwang, Heuksujung, Deurechan, Namil, Hyeonpum, Saeodae, Sobi, Huimangchan, Sangnambatbyeo, Boramchal (13)                                                                                                                                                                                                                                                           |
